# Supplementary material for: Hypolipidemic Effect of Arthrospira (Spirulina) maxima Supplementation and a Systematic Physical Exercise Program in Overweight and Obese Men: A Double-Blind, Randomized, and Crossover Controlled Trial
Source: MDPI journal article supplement (doi:10.3390/md17050270), 2019-05-07
Supplement: s1 [file s1]

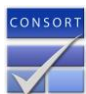

## Supplementary File 1. CONSORT 2010 Checklist of information to include when reporting a randomized trial

| Section/Topic                    | Item No | Checklist item                                                                                                                                                                              | Reported on page No |
|----------------------------------|---------|---------------------------------------------------------------------------------------------------------------------------------------------------------------------------------------------|---------------------|
| <b>Title and abstract</b>        |         |                                                                                                                                                                                             |                     |
|                                  | 1a      | Identification as a randomised trial in the title                                                                                                                                           | Page 1              |
|                                  | 1b      | Structured summary of trial design, methods, results, and conclusions (for specific guidance see CONSORT for abstracts)                                                                     | Page 1              |
| <b>Introduction</b>              |         |                                                                                                                                                                                             |                     |
| Background and objectives        | 2a      | Scientific background and explanation of rationale                                                                                                                                          | Pages 1-2           |
|                                  | 2b      | Specific objectives or hypotheses                                                                                                                                                           | Pages 2,10          |
| <b>Methods</b>                   |         |                                                                                                                                                                                             |                     |
| Trial design                     | 3a      | Description of trial design (such as parallel, factorial) including allocation ratio                                                                                                        | Pages 8-9           |
|                                  | 3b      | Important changes to methods after trial commencement (such as eligibility criteria), with reasons                                                                                          | N/A                 |
| Participants                     | 4a      | Eligibility criteria for participants                                                                                                                                                       | Page 8              |
|                                  | 4b      | Settings and locations where the data were collected                                                                                                                                        | Pages 8,10          |
| Interventions                    | 5       | The interventions for each group with sufficient details to allow replication, including how and when they were actually administered                                                       | Pages 8-10          |
| Outcomes                         | 6a      | Completely defined pre-specified primary and secondary outcome measures, including how and when they were assessed                                                                          | Pages 8-10          |
|                                  | 6b      | Any changes to trial outcomes after the trial commenced, with reasons                                                                                                                       | N/A                 |
| Sample size                      | 7a      | How sample size was determined                                                                                                                                                              | Page 8              |
|                                  | 7b      | When applicable, explanation of any interim analyses and stopping guidelines                                                                                                                | N/A                 |
| Randomisation:                   |         |                                                                                                                                                                                             |                     |
| Sequence generation              | 8a      | Method used to generate the random allocation sequence                                                                                                                                      | Page 8              |
|                                  | 8b      | Type of randomisation; details of any restriction (such as blocking and block size)                                                                                                         | Page 8              |
| Allocation concealment mechanism | 9       | Mechanism used to implement the random allocation sequence (such as sequentially numbered containers), describing any steps taken to conceal the sequence until interventions were assigned | Page 8              |
| Implementation                   | 10      | Who generated the random allocation sequence, who enrolled participants, and who assigned participants to interventions                                                                     | Page 8              |
| Blinding                         | 11a     | If done, who was blinded after assignment to interventions (for example, participants, care providers, those assessing outcomes) and how                                                    | Page 8              |

|                                                      |     |                                                                                                                                                   |                         |
|------------------------------------------------------|-----|---------------------------------------------------------------------------------------------------------------------------------------------------|-------------------------|
| Statistical methods                                  | 11b | If relevant, description of the similarity of interventions                                                                                       | N/A                     |
|                                                      | 12a | Statistical methods used to compare groups for primary and secondary outcomes                                                                     | Page 10                 |
|                                                      | 12b | Methods for additional analyses, such as subgroup analyses and adjusted analyses                                                                  | Page 10                 |
| <b>Results</b>                                       |     |                                                                                                                                                   |                         |
| Participant flow (a diagram is strongly recommended) | 13a | For each group, the numbers of participants who were randomly assigned, received intended treatment, and were analysed for the primary outcome    | Figure 4, Suppl. File 2 |
|                                                      | 13b | For each group, losses and exclusions after randomisation, together with reasons                                                                  | N/A                     |
| Recruitment                                          | 14a | Dates defining the periods of recruitment and follow-up                                                                                           | Pages 8-10              |
|                                                      | 14b | Why the trial ended or was stopped                                                                                                                | N/A                     |
| Baseline data                                        | 15  | A table showing baseline demographic and clinical characteristics for each group                                                                  | Table 1                 |
| Numbers analysed                                     | 16  | For each group, number of participants (denominator) included in each analysis and whether the analysis was by original assigned groups           | Figure 4                |
| Outcomes and estimation                              | 17a | For each primary and secondary outcome, results for each group, and the estimated effect size and its precision (such as 95% confidence interval) | Pages 2-6               |
|                                                      | 17b | For binary outcomes, presentation of both absolute and relative effect sizes is recommended                                                       | N/A                     |
| Ancillary analyses                                   | 18  | Results of any other analyses performed, including subgroup analyses and adjusted analyses, distinguishing pre-specified from exploratory         | N/A                     |
| Harms                                                | 19  | All important harms or unintended effects in each group (for specific guidance see CONSORT for harms)                                             | N/A                     |
| <b>Discussion</b>                                    |     |                                                                                                                                                   |                         |
| Limitations                                          | 20  | Trial limitations, addressing sources of potential bias, imprecision, and, if relevant, multiplicity of analyses                                  | N/A                     |
| Generalisability                                     | 21  | Generalisability (external validity, applicability) of the trial findings                                                                         | Pages 6-7               |
| Interpretation                                       | 22  | Interpretation consistent with results, balancing benefits and harms, and considering other relevant evidence                                     | Pages 6-7               |
| <b>Other information</b>                             |     |                                                                                                                                                   |                         |
| Registration                                         | 23  | Registration number and name of trial registry                                                                                                    | Page 7                  |
| Protocol                                             | 24  | Where the full trial protocol can be accessed, if available                                                                                       | Page 1                  |
| Funding                                              | 25  | Sources of funding and other support (such as supply of drugs), role of funders                                                                   | Pages 7,10              |
