# Supplementary material for: Hypolipidemic Effect of Arthrospira (Spirulina) maxima Supplementation and a Systematic Physical Exercise Program in Overweight and Obese Men: A Double-Blind, Randomized, and Crossover Controlled Trial
Source: MDPI journal article supplement (doi:10.3390/md17050270), 2019-05-07

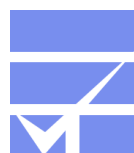

# CONSORT

TRANSPARENT REPORTING of TRIALS

## Supplementary File 2. CONSORT 2010 Flow Diagram of the progress through the phases of the trial.

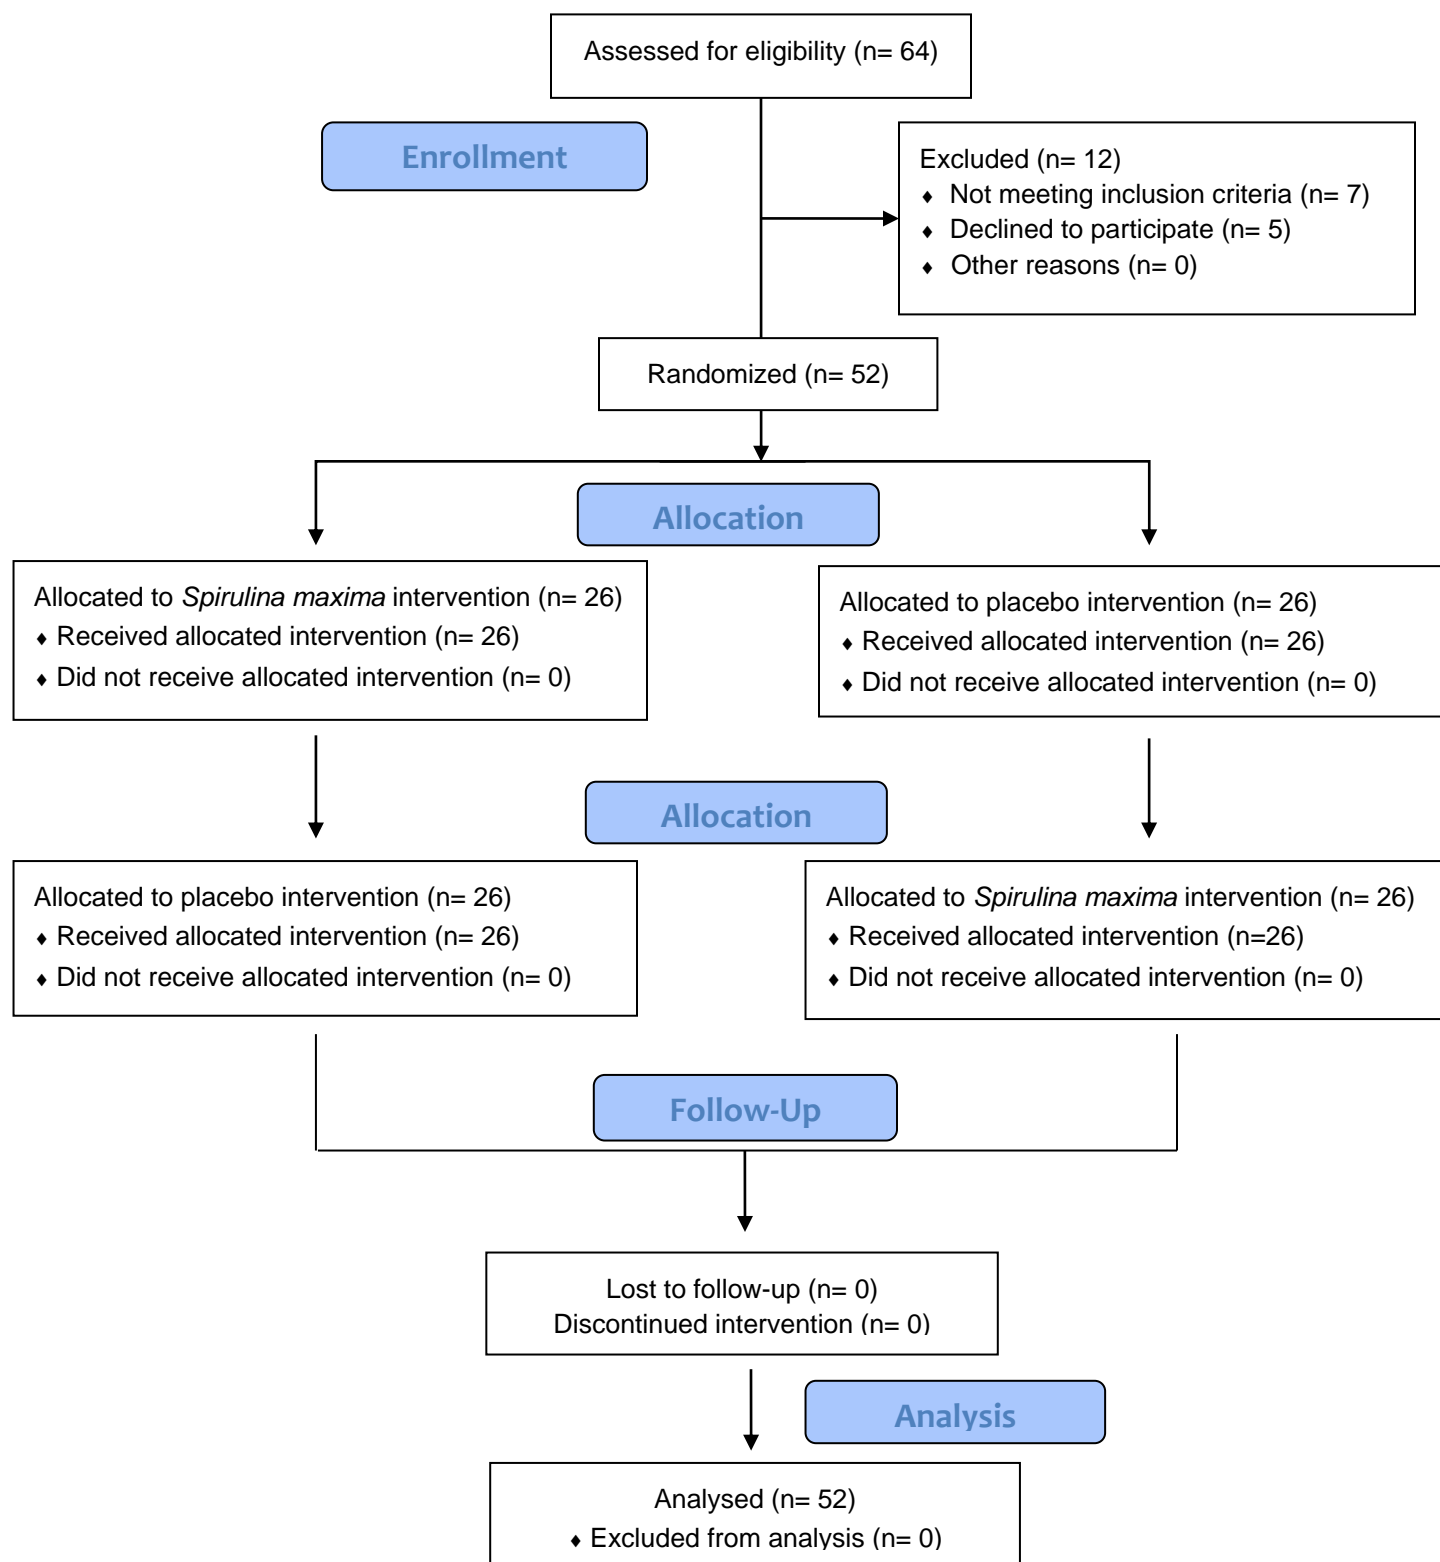

Supplement: s1 [file s1]
