# Supplementary material for: Hypolipidemic Effect of Arthrospira (Spirulina) maxima Supplementation and a Systematic Physical Exercise Program in Overweight and Obese Men: A Double-Blind, Randomized, and Crossover Controlled Trial
Source: MDPI journal article supplement (doi:10.3390/md17050270), 2019-05-07
Supplement: s1 [file s1]

## Supplementary File 3. Statistical Analysis

**Table 2**

Effect of **C** on **TC** within the total of participants

| Independent Samples Test |                             |                                         |      |                              |        |                 |                 |                       |                                           |          |
|--------------------------|-----------------------------|-----------------------------------------|------|------------------------------|--------|-----------------|-----------------|-----------------------|-------------------------------------------|----------|
|                          |                             | Levene's Test for Equality of Variances |      | t-test for Equality of Means |        |                 |                 |                       |                                           |          |
|                          |                             | F                                       | Sig. | t                            | df     | Sig. (2-tailed) | Mean Difference | Std. Error Difference | 95% Confidence Interval of the Difference |          |
|                          |                             |                                         |      |                              |        |                 |                 |                       | Lower                                     | Upper    |
| TC                       | Equal variances assumed     | .042                                    | .839 | .501                         | 46     | .619            | 4.50000         | 8.97772               | -13.57122                                 | 22.57122 |
|                          | Equal variances not assumed |                                         |      | .501                         | 45.994 | .619            | 4.50000         | 8.97772               | -13.57128                                 | 22.57128 |

Effect of **SE** on **TC** within the total of participants

| Independent Samples Test |                             |                                         |      |                              |        |                 |                 |                       |                                           |          |
|--------------------------|-----------------------------|-----------------------------------------|------|------------------------------|--------|-----------------|-----------------|-----------------------|-------------------------------------------|----------|
|                          |                             | Levene's Test for Equality of Variances |      | t-test for Equality of Means |        |                 |                 |                       |                                           |          |
|                          |                             | F                                       | Sig. | t                            | df     | Sig. (2-tailed) | Mean Difference | Std. Error Difference | 95% Confidence Interval of the Difference |          |
|                          |                             |                                         |      |                              |        |                 |                 |                       | Lower                                     | Upper    |
| TC                       | Equal variances assumed     | .129                                    | .721 | 3.677                        | 52     | .001            | 33.74074        | 9.17529               | 15.32918                                  | 52.15230 |
|                          | Equal variances not assumed |                                         |      | 3.677                        | 51.786 | .001            | 33.74074        | 9.17529               | 15.32737                                  | 52.15411 |

Effect of **Ex** on **TC** within the total of participants

| Independent Samples Test |                             |                                         |      |                              |        |                 |                 |                       |                                           |          |
|--------------------------|-----------------------------|-----------------------------------------|------|------------------------------|--------|-----------------|-----------------|-----------------------|-------------------------------------------|----------|
|                          |                             | Levene's Test for Equality of Variances |      | t-test for Equality of Means |        |                 |                 |                       |                                           |          |
|                          |                             | F                                       | Sig. | t                            | df     | Sig. (2-tailed) | Mean Difference | Std. Error Difference | 95% Confidence Interval of the Difference |          |
|                          |                             |                                         |      |                              |        |                 |                 |                       | Lower                                     | Upper    |
| TC                       | Equal variances assumed     | .296                                    | .588 | 1.977                        | 52     | .053            | 19.81481        | 10.02430              | -.30042                                   | 39.93005 |
|                          | Equal variances not assumed |                                         |      | 1.977                        | 51.753 | .053            | 19.81481        | 10.02430              | -.30271                                   | 39.93233 |

Effect of **Sm** on **TC** within the total of participants

| Independent Samples Test |                             |                                         |      |                              |        |                 |                 |                       |                                           |          |
|--------------------------|-----------------------------|-----------------------------------------|------|------------------------------|--------|-----------------|-----------------|-----------------------|-------------------------------------------|----------|
|                          |                             | Levene's Test for Equality of Variances |      | t-test for Equality of Means |        |                 |                 |                       |                                           |          |
|                          |                             | F                                       | Sig. | t                            | df     | Sig. (2-tailed) | Mean Difference | Std. Error Difference | 95% Confidence Interval of the Difference |          |
|                          |                             |                                         |      |                              |        |                 |                 |                       | Lower                                     | Upper    |
| TC                       | Equal variances assumed     | .238                                    | .628 | 1.665                        | 46     | .103            | 18.20833        | 10.93908              | -3.81090                                  | 40.22757 |
|                          | Equal variances not assumed |                                         |      | 1.665                        | 45.950 | .103            | 18.20833        | 10.93908              | -3.81155                                  | 40.22821 |

Effect of **C** on **TG** within the total of participants

| Independent Samples Test |                             |                                         |      |                              |        |                 |                 |                       |                                           |          |
|--------------------------|-----------------------------|-----------------------------------------|------|------------------------------|--------|-----------------|-----------------|-----------------------|-------------------------------------------|----------|
|                          |                             | Levene's Test for Equality of Variances |      | t-test for Equality of Means |        |                 |                 |                       |                                           |          |
|                          |                             | F                                       | Sig. | t                            | df     | Sig. (2-tailed) | Mean Difference | Std. Error Difference | 95% Confidence Interval of the Difference |          |
|                          |                             |                                         |      |                              |        |                 |                 |                       | Lower                                     | Upper    |
| TG                       | Equal variances assumed     | .070                                    | .793 | .653                         | 44     | .517            | 6.04348         | 9.25740               | -12.61358                                 | 24.70054 |
|                          | Equal variances not assumed |                                         |      | .653                         | 43.973 | .517            | 6.04348         | 9.25740               | -12.61391                                 | 24.70086 |

### Effect of SE on TG within the total of participants

Independent Samples Test

|    |                             | Levene's Test for Equality of Variances |      | t-test for Equality of Means |        |                 |                 |                       |                                           |          |
|----|-----------------------------|-----------------------------------------|------|------------------------------|--------|-----------------|-----------------|-----------------------|-------------------------------------------|----------|
|    |                             | F                                       | Sig. | t                            | df     | Sig. (2-tailed) | Mean Difference | Std. Error Difference | 95% Confidence Interval of the Difference |          |
|    |                             |                                         |      |                              |        |                 |                 |                       | Lower                                     | Upper    |
| TG | Equal variances assumed     | .362                                    | .550 | 1.853                        | 46     | .070            | 22.50000        | 12.14025              | -1.93706                                  | 46.93706 |
|    | Equal variances not assumed |                                         |      | 1.853                        | 43.368 | .071            | 22.50000        | 12.14025              | -1.97714                                  | 46.97714 |

### Effect of Ex on TG within the total of participants

Independent Samples Test

|    |                             | Levene's Test for Equality of Variances |      | t-test for Equality of Means |        |                 |                 |                       |                                           |          |
|----|-----------------------------|-----------------------------------------|------|------------------------------|--------|-----------------|-----------------|-----------------------|-------------------------------------------|----------|
|    |                             | F                                       | Sig. | t                            | df     | Sig. (2-tailed) | Mean Difference | Std. Error Difference | 95% Confidence Interval of the Difference |          |
|    |                             |                                         |      |                              |        |                 |                 |                       | Lower                                     | Upper    |
| TG | Equal variances assumed     | .033                                    | .857 | 1.263                        | 50     | .212            | 15.11538        | 11.96518              | -8.91738                                  | 39.14815 |
|    | Equal variances not assumed |                                         |      | 1.263                        | 49.946 | .212            | 15.11538        | 11.96518              | -8.91803                                  | 39.14880 |

### Effect of Sm on TG within the total of participants

Independent Samples Test

|    |                             | Levene's Test for Equality of Variances |      | t-test for Equality of Means |        |                 |                 |                       |                                           |          |
|----|-----------------------------|-----------------------------------------|------|------------------------------|--------|-----------------|-----------------|-----------------------|-------------------------------------------|----------|
|    |                             | F                                       | Sig. | t                            | df     | Sig. (2-tailed) | Mean Difference | Std. Error Difference | 95% Confidence Interval of the Difference |          |
|    |                             |                                         |      |                              |        |                 |                 |                       | Lower                                     | Upper    |
| TG | Equal variances assumed     | .160                                    | .691 | 1.374                        | 46     | .176            | 14.12500        | 10.27909              | -6.56573                                  | 34.81573 |
|    | Equal variances not assumed |                                         |      | 1.374                        | 45.736 | .176            | 14.12500        | 10.27909              | -6.56895                                  | 34.81895 |

### Effect of C on LDL-C within the total of participants

Independent Samples Test

|     |                             | Levene's Test for Equality of Variances |      | t-test for Equality of Means |        |                 |                 |                       |                                           |          |
|-----|-----------------------------|-----------------------------------------|------|------------------------------|--------|-----------------|-----------------|-----------------------|-------------------------------------------|----------|
|     |                             | F                                       | Sig. | t                            | df     | Sig. (2-tailed) | Mean Difference | Std. Error Difference | 95% Confidence Interval of the Difference |          |
|     |                             |                                         |      |                              |        |                 |                 |                       | Lower                                     | Upper    |
| LDL | Equal variances assumed     | .199                                    | .658 | .416                         | 42     | .680            | 3.90000         | 9.38077               | -15.03117                                 | 22.83117 |
|     | Equal variances not assumed |                                         |      | .416                         | 41.906 | .680            | 3.90000         | 9.38077               | -15.03243                                 | 22.83243 |

### Effect of SE on LDL-C within the total of participants

Independent Samples Test

|     |                             | Levene's Test for Equality of Variances |      | t-test for Equality of Means |        |                 |                 |                       |                                           |          |
|-----|-----------------------------|-----------------------------------------|------|------------------------------|--------|-----------------|-----------------|-----------------------|-------------------------------------------|----------|
|     |                             | F                                       | Sig. | t                            | df     | Sig. (2-tailed) | Mean Difference | Std. Error Difference | 95% Confidence Interval of the Difference |          |
|     |                             |                                         |      |                              |        |                 |                 |                       | Lower                                     | Upper    |
| LDL | Equal variances assumed     | .031                                    | .861 | 3.461                        | 46     | .001            | 34.62500        | 10.00352              | 14.48896                                  | 54.76104 |
|     | Equal variances not assumed |                                         |      | 3.461                        | 45.876 | .001            | 34.62500        | 10.00352              | 14.48748                                  | 54.76252 |

### Effect of **Ex** on **LDL-C** within the total of participants

**Independent Samples Test**

|     |                             | Levene's Test for Equality of Variances |      | t-test for Equality of Means |        |                 |                 |                       |                                           |          |
|-----|-----------------------------|-----------------------------------------|------|------------------------------|--------|-----------------|-----------------|-----------------------|-------------------------------------------|----------|
|     |                             | F                                       | Sig. | t                            | df     | Sig. (2-tailed) | Mean Difference | Std. Error Difference | 95% Confidence Interval of the Difference |          |
|     |                             |                                         |      |                              |        |                 |                 |                       | Lower                                     | Upper    |
| LDL | Equal variances assumed     | .291                                    | .592 | 2.049                        | 46     | .046            | 21.96667        | 10.72233              | .38373                                    | 43.54960 |
|     | Equal variances not assumed |                                         |      | 2.049                        | 45.860 | .046            | 21.96667        | 10.72233              | .38195                                    | 43.55138 |

### Effect of **Sm** on **LDL-C** within the total of participants

**Independent Samples Test**

|     |                             | Levene's Test for Equality of Variances |      | t-test for Equality of Means |        |                 |                 |                       |                                           |          |
|-----|-----------------------------|-----------------------------------------|------|------------------------------|--------|-----------------|-----------------|-----------------------|-------------------------------------------|----------|
|     |                             | F                                       | Sig. | t                            | df     | Sig. (2-tailed) | Mean Difference | Std. Error Difference | 95% Confidence Interval of the Difference |          |
|     |                             |                                         |      |                              |        |                 |                 |                       | Lower                                     | Upper    |
| LDL | Equal variances assumed     | .004                                    | .947 | 1.911                        | 46     | .062            | 20.84167        | 10.90583              | -1.11063                                  | 42.79396 |
|     | Equal variances not assumed |                                         |      | 1.911                        | 45.941 | .062            | 20.84167        | 10.90583              | -1.11139                                  | 42.79472 |

### Effect of **C** on **HDL-C** within the total of participants

**Independent Samples Test**

|     |                             | Levene's Test for Equality of Variances |      | t-test for Equality of Means |        |                 |                 |                       |                                           |         |
|-----|-----------------------------|-----------------------------------------|------|------------------------------|--------|-----------------|-----------------|-----------------------|-------------------------------------------|---------|
|     |                             | F                                       | Sig. | t                            | df     | Sig. (2-tailed) | Mean Difference | Std. Error Difference | 95% Confidence Interval of the Difference |         |
|     |                             |                                         |      |                              |        |                 |                 |                       | Lower                                     | Upper   |
| HDL | Equal variances assumed     | 1.768                                   | .190 | -.450                        | 44     | .655            | -1.34783        | 2.99475               | -7.38336                                  | 4.68770 |
|     | Equal variances not assumed |                                         |      | -.450                        | 40.175 | .655            | -1.34783        | 2.99475               | -7.39963                                  | 4.70398 |

### Effect of **SE** on **HDL-C** within the total of participants

**Independent Samples Test**

|     |                             | Levene's Test for Equality of Variances |      | t-test for Equality of Means |        |                 |                 |                       |                                           |          |
|-----|-----------------------------|-----------------------------------------|------|------------------------------|--------|-----------------|-----------------|-----------------------|-------------------------------------------|----------|
|     |                             | F                                       | Sig. | t                            | df     | Sig. (2-tailed) | Mean Difference | Std. Error Difference | 95% Confidence Interval of the Difference |          |
|     |                             |                                         |      |                              |        |                 |                 |                       | Lower                                     | Upper    |
| HDL | Equal variances assumed     | .058                                    | .811 | -2.898                       | 52     | .005            | -7.33333        | 2.53014               | -12.41043                                 | -2.25624 |
|     | Equal variances not assumed |                                         |      | -2.898                       | 50.962 | .006            | -7.33333        | 2.53014               | -12.41289                                 | -2.25378 |

### Effect of **Ex** on **HDL-C** within the total of participants

**Independent Samples Test**

|     |                             | Levene's Test for Equality of Variances |      | t-test for Equality of Means |        |                 |                 |                       |                                           |        |
|-----|-----------------------------|-----------------------------------------|------|------------------------------|--------|-----------------|-----------------|-----------------------|-------------------------------------------|--------|
|     |                             | F                                       | Sig. | t                            | df     | Sig. (2-tailed) | Mean Difference | Std. Error Difference | 95% Confidence Interval of the Difference |        |
|     |                             |                                         |      |                              |        |                 |                 |                       | Lower                                     | Upper  |
| HDL | Equal variances assumed     | .009                                    | .926 | -1.930                       | 48     | .059            | -4.72000        | 2.44524               | -9.63649                                  | .19649 |
|     | Equal variances not assumed |                                         |      | -1.930                       | 47.974 | .059            | -4.72000        | 2.44524               | -9.63655                                  | .19655 |

### Effect of **Sm** on **HDL-C** within the total of participants

**Independent Samples Test**

|     |                             | Levene's Test for Equality of Variances |      | t-test for Equality of Means |        |                 |                 |                       |                                           |        |
|-----|-----------------------------|-----------------------------------------|------|------------------------------|--------|-----------------|-----------------|-----------------------|-------------------------------------------|--------|
|     |                             | F                                       | Sig. | t                            | df     | Sig. (2-tailed) | Mean Difference | Std. Error Difference | 95% Confidence Interval of the Difference |        |
|     |                             |                                         |      |                              |        |                 |                 |                       | Lower                                     | Upper  |
| HDL | Equal variances assumed     | .073                                    | .788 | -1.849                       | 46     | .071            | -5.45833        | 2.95190               | -11.40019                                 | .48353 |
|     | Equal variances not assumed |                                         |      | -1.849                       | 45.392 | .071            | -5.45833        | 2.95190               | -11.40234                                 | .48567 |

### Effect of **C** on **TC** within dyslipidemic participants

**Independent Samples Test**

|           |                             | Levene's Test for Equality of Variances |      | t-test for Equality of Means |        |                 |                 |                       |                                           |          |
|-----------|-----------------------------|-----------------------------------------|------|------------------------------|--------|-----------------|-----------------|-----------------------|-------------------------------------------|----------|
|           |                             | F                                       | Sig. | t                            | df     | Sig. (2-tailed) | Mean Difference | Std. Error Difference | 95% Confidence Interval of the Difference |          |
|           |                             |                                         |      |                              |        |                 |                 |                       | Lower                                     | Upper    |
| CT_Dyslip | Equal variances assumed     | .183                                    | .674 | .841                         | 18     | .412            | 6.40000         | 7.61212               | -9.59248                                  | 22.39248 |
|           | Equal variances not assumed |                                         |      | .841                         | 17.507 | .412            | 6.40000         | 7.61212               | -9.62480                                  | 22.42480 |

### Effect of **SE** on **TC** within dyslipidemic participants

**Independent Samples Test**

|           |                             | Levene's Test for Equality of Variances |      | t-test for Equality of Means |        |                 |                 |                       |                                           |          |
|-----------|-----------------------------|-----------------------------------------|------|------------------------------|--------|-----------------|-----------------|-----------------------|-------------------------------------------|----------|
|           |                             | F                                       | Sig. | t                            | df     | Sig. (2-tailed) | Mean Difference | Std. Error Difference | 95% Confidence Interval of the Difference |          |
|           |                             |                                         |      |                              |        |                 |                 |                       | Lower                                     | Upper    |
| CT_Dyslip | Equal variances assumed     | 1.130                                   | .298 | 4.373                        | 24     | .000            | 36.30769        | 8.30348               | 19.17016                                  | 53.44523 |
|           | Equal variances not assumed |                                         |      | 4.373                        | 23.833 | .000            | 36.30769        | 8.30348               | 19.16378                                  | 53.45160 |

### Effect of **Ex** on **TC** within dyslipidemic participants

**Independent Samples Test**

|           |                             | Levene's Test for Equality of Variances |      | t-test for Equality of Means |        |                 |                 |                       |                                           |          |
|-----------|-----------------------------|-----------------------------------------|------|------------------------------|--------|-----------------|-----------------|-----------------------|-------------------------------------------|----------|
|           |                             | F                                       | Sig. | t                            | df     | Sig. (2-tailed) | Mean Difference | Std. Error Difference | 95% Confidence Interval of the Difference |          |
|           |                             |                                         |      |                              |        |                 |                 |                       | Lower                                     | Upper    |
| CT_Dyslip | Equal variances assumed     | .238                                    | .630 | 2.411                        | 22     | .025            | 24.91667        | 10.33526              | 3.48265                                   | 46.35068 |
|           | Equal variances not assumed |                                         |      | 2.411                        | 21.303 | .025            | 24.91667        | 10.33526              | 3.44193                                   | 46.39140 |

### Effect of **Sm** on **TC** within dyslipidemic participants

**Independent Samples Test**

|           |                             | Levene's Test for Equality of Variances |      | t-test for Equality of Means |        |                 |                 |                       |                                           |          |
|-----------|-----------------------------|-----------------------------------------|------|------------------------------|--------|-----------------|-----------------|-----------------------|-------------------------------------------|----------|
|           |                             | F                                       | Sig. | t                            | df     | Sig. (2-tailed) | Mean Difference | Std. Error Difference | 95% Confidence Interval of the Difference |          |
|           |                             |                                         |      |                              |        |                 |                 |                       | Lower                                     | Upper    |
| CT_Dyslip | Equal variances assumed     | .691                                    | .415 | 2.341                        | 22     | .029            | 21.16667        | 9.04248               | 2.41371                                   | 39.91962 |
|           | Equal variances not assumed |                                         |      | 2.341                        | 21.860 | .029            | 21.16667        | 9.04248               | 2.40676                                   | 39.92658 |

### Effect of C on TG within dyslipidemic participants

Independent Samples Test

|           |                             | Levene's Test for Equality of Variances |      | t-test for Equality of Means |        |                 |                 |                       |                                           |          |
|-----------|-----------------------------|-----------------------------------------|------|------------------------------|--------|-----------------|-----------------|-----------------------|-------------------------------------------|----------|
|           |                             | F                                       | Sig. | t                            | df     | Sig. (2-tailed) | Mean Difference | Std. Error Difference | 95% Confidence Interval of the Difference |          |
|           |                             |                                         |      |                              |        |                 |                 |                       | Lower                                     | Upper    |
| TG_Dyslip | Equal variances assumed     | 6.799                                   | .019 | 1.520                        | 16     | .148            | 6.77778         | 4.45797               | -2.67269                                  | 16.22824 |
|           | Equal variances not assumed |                                         |      | 1.520                        | 11.312 | .156            | 6.77778         | 4.45797               | -3.00119                                  | 16.55675 |

### Effect of SE on TG within dyslipidemic participants

Independent Samples Test

|           |                             | Levene's Test for Equality of Variances |      | t-test for Equality of Means |        |                 |                 |                       |                                           |          |
|-----------|-----------------------------|-----------------------------------------|------|------------------------------|--------|-----------------|-----------------|-----------------------|-------------------------------------------|----------|
|           |                             | F                                       | Sig. | t                            | df     | Sig. (2-tailed) | Mean Difference | Std. Error Difference | 95% Confidence Interval of the Difference |          |
|           |                             |                                         |      |                              |        |                 |                 |                       | Lower                                     | Upper    |
| TG_Dyslip | Equal variances assumed     | .129                                    | .722 | 2.122                        | 26     | .043            | 28.00000        | 13.19317              | .88106                                    | 55.11894 |
|           | Equal variances not assumed |                                         |      | 2.122                        | 23.976 | .044            | 28.00000        | 13.19317              | .76920                                    | 55.23080 |

### Effect of Ex on TG within dyslipidemic participants

Independent Samples Test

|           |                             | Levene's Test for Equality of Variances |      | t-test for Equality of Means |        |                 |                 |                       |                                           |          |
|-----------|-----------------------------|-----------------------------------------|------|------------------------------|--------|-----------------|-----------------|-----------------------|-------------------------------------------|----------|
|           |                             | F                                       | Sig. | t                            | df     | Sig. (2-tailed) | Mean Difference | Std. Error Difference | 95% Confidence Interval of the Difference |          |
|           |                             |                                         |      |                              |        |                 |                 |                       | Lower                                     | Upper    |
| TG_Dyslip | Equal variances assumed     | .224                                    | .641 | 1.739                        | 22     | .096            | 16.25000        | 9.34695               | -3.13439                                  | 35.63439 |
|           | Equal variances not assumed |                                         |      | 1.739                        | 21.397 | .096            | 16.25000        | 9.34695               | -3.16611                                  | 35.66611 |

### Effect of Sm on TG within dyslipidemic participants

Independent Samples Test

|           |                             | Levene's Test for Equality of Variances |      | t-test for Equality of Means |        |                 |                 |                       |                                           |          |
|-----------|-----------------------------|-----------------------------------------|------|------------------------------|--------|-----------------|-----------------|-----------------------|-------------------------------------------|----------|
|           |                             | F                                       | Sig. | t                            | df     | Sig. (2-tailed) | Mean Difference | Std. Error Difference | 95% Confidence Interval of the Difference |          |
|           |                             |                                         |      |                              |        |                 |                 |                       | Lower                                     | Upper    |
| TG_Dyslip | Equal variances assumed     | 1.199                                   | .284 | 3.142                        | 24     | .004            | 19.30769        | 6.14527               | 6.62449                                   | 31.99090 |
|           | Equal variances not assumed |                                         |      | 3.142                        | 18.655 | .005            | 19.30769        | 6.14527               | 6.42939                                   | 32.18600 |

### Effect of C on LDL-C within dyslipidemic participants

Independent Samples Test

|            |                             | Levene's Test for Equality of Variances |      | t-test for Equality of Means |        |                 |                 |                       |                                           |          |
|------------|-----------------------------|-----------------------------------------|------|------------------------------|--------|-----------------|-----------------|-----------------------|-------------------------------------------|----------|
|            |                             | F                                       | Sig. | t                            | df     | Sig. (2-tailed) | Mean Difference | Std. Error Difference | 95% Confidence Interval of the Difference |          |
|            |                             |                                         |      |                              |        |                 |                 |                       | Lower                                     | Upper    |
| LDL_Dyslip | Equal variances assumed     | .417                                    | .523 | .458                         | 34     | .650            | 4.30000         | 9.38776               | -14.77822                                 | 23.37822 |
|            | Equal variances not assumed |                                         |      | .458                         | 33.869 | .650            | 4.30000         | 9.38776               | -14.78093                                 | 23.38093 |

### Effect of **SE** on **LDL-C** within dyslipidemic participants

| Independent Samples Test |                             |                                         |      |                              |        |                 |                 |                       |                                           |          |
|--------------------------|-----------------------------|-----------------------------------------|------|------------------------------|--------|-----------------|-----------------|-----------------------|-------------------------------------------|----------|
|                          |                             | Levene's Test for Equality of Variances |      | t-test for Equality of Means |        |                 |                 |                       |                                           |          |
|                          |                             | F                                       | Sig. | t                            | df     | Sig. (2-tailed) | Mean Difference | Std. Error Difference | 95% Confidence Interval of the Difference |          |
|                          |                             |                                         |      |                              |        |                 |                 |                       | Lower                                     | Upper    |
| LDL_Dyslip               | Equal variances assumed     | .860                                    | .360 | 3.767                        | 34     | .001            | 40.02222        | 10.62349              | 18.43270                                  | 61.61174 |
|                          | Equal variances not assumed |                                         |      | 3.767                        | 33.203 | .001            | 40.02222        | 10.62349              | 18.41360                                  | 61.63084 |

### Effect of **Ex** on **LDL-C** within dyslipidemic participants

| Independent Samples Test |                             |                                         |      |                              |        |                 |                 |                       |                                           |          |
|--------------------------|-----------------------------|-----------------------------------------|------|------------------------------|--------|-----------------|-----------------|-----------------------|-------------------------------------------|----------|
|                          |                             | Levene's Test for Equality of Variances |      | t-test for Equality of Means |        |                 |                 |                       |                                           |          |
|                          |                             | F                                       | Sig. | t                            | df     | Sig. (2-tailed) | Mean Difference | Std. Error Difference | 95% Confidence Interval of the Difference |          |
|                          |                             |                                         |      |                              |        |                 |                 |                       | Lower                                     | Upper    |
| LDL_Dyslip               | Equal variances assumed     | .002                                    | .964 | 2.261                        | 38     | .030            | 23.64000        | 10.45350              | 2.47800                                   | 44.80200 |
|                          | Equal variances not assumed |                                         |      | 2.261                        | 37.998 | .030            | 23.64000        | 10.45350              | 2.47796                                   | 44.80204 |

### Effect of **Sm** on **LDL-C** within dyslipidemic participants

| Independent Samples Test |                             |                                         |      |                              |        |                 |                 |                       |                                           |          |
|--------------------------|-----------------------------|-----------------------------------------|------|------------------------------|--------|-----------------|-----------------|-----------------------|-------------------------------------------|----------|
|                          |                             | Levene's Test for Equality of Variances |      | t-test for Equality of Means |        |                 |                 |                       |                                           |          |
|                          |                             | F                                       | Sig. | t                            | df     | Sig. (2-tailed) | Mean Difference | Std. Error Difference | 95% Confidence Interval of the Difference |          |
|                          |                             |                                         |      |                              |        |                 |                 |                       | Lower                                     | Upper    |
| LDL_Dyslip               | Equal variances assumed     | .051                                    | .823 | 1.936                        | 38     | .060            | 19.78000        | 10.21901              | -9.0731                                   | 40.46731 |
|                          | Equal variances not assumed |                                         |      | 1.936                        | 37.962 | .060            | 19.78000        | 10.21901              | -9.0798                                   | 40.46798 |

### Effect of **C** on **HDL-C** within dyslipidemic participants

| Independent Samples Test |                             |                                         |      |                              |        |                 |                 |                       |                                           |         |
|--------------------------|-----------------------------|-----------------------------------------|------|------------------------------|--------|-----------------|-----------------|-----------------------|-------------------------------------------|---------|
|                          |                             | Levene's Test for Equality of Variances |      | t-test for Equality of Means |        |                 |                 |                       |                                           |         |
|                          |                             | F                                       | Sig. | t                            | df     | Sig. (2-tailed) | Mean Difference | Std. Error Difference | 95% Confidence Interval of the Difference |         |
|                          |                             |                                         |      |                              |        |                 |                 |                       | Lower                                     | Upper   |
| HDL_Dyslip               | Equal variances assumed     | 7.309                                   | .012 | -1.415                       | 26     | .169            | -3.35714        | 2.37241               | -8.23370                                  | 1.51942 |
|                          | Equal variances not assumed |                                         |      | -1.415                       | 21.295 | .172            | -3.35714        | 2.37241               | -8.28669                                  | 1.57240 |

### Effect of **SE** on **HDL-C** within dyslipidemic participants

| Independent Samples Test |                             |                                         |      |                              |        |                 |                 |                       |                                           |          |
|--------------------------|-----------------------------|-----------------------------------------|------|------------------------------|--------|-----------------|-----------------|-----------------------|-------------------------------------------|----------|
|                          |                             | Levene's Test for Equality of Variances |      | t-test for Equality of Means |        |                 |                 |                       |                                           |          |
|                          |                             | F                                       | Sig. | t                            | df     | Sig. (2-tailed) | Mean Difference | Std. Error Difference | 95% Confidence Interval of the Difference |          |
|                          |                             |                                         |      |                              |        |                 |                 |                       | Lower                                     | Upper    |
| HDL_Dyslip               | Equal variances assumed     | 1.321                                   | .258 | -3.652                       | 38     | .001            | -9.05000        | 2.47830               | -14.06706                                 | -4.03294 |
|                          | Equal variances not assumed |                                         |      | -3.652                       | 30.721 | .001            | -9.05000        | 2.47830               | -14.10639                                 | -3.99361 |

### Effect of Ex on HDL-C within dyslipidemic participants

| Independent Samples Test |                             |                                         |      |                              |        |                 |                 |                       |                                           |
|--------------------------|-----------------------------|-----------------------------------------|------|------------------------------|--------|-----------------|-----------------|-----------------------|-------------------------------------------|
|                          |                             | Levene's Test for Equality of Variances |      | t-test for Equality of Means |        |                 |                 |                       |                                           |
|                          |                             | F                                       | Sig. | t                            | df     | Sig. (2-tailed) | Mean Difference | Std. Error Difference | 95% Confidence Interval of the Difference |
| HDL_Dyslip               | Equal variances assumed     | .015                                    | .904 | -2.445                       | 38     | .019            | -4.95000        | 2.02468               | -9.04876 - .85124                         |
|                          | Equal variances not assumed |                                         |      | -2.445                       | 37.999 | .019            | -4.95000        | 2.02468               | -9.04876 - .85124                         |

### Effect of Sm on HDL-C within dyslipidemic participants

| Independent Samples Test |                             |                                         |      |                              |        |                 |                 |                       |                                           |
|--------------------------|-----------------------------|-----------------------------------------|------|------------------------------|--------|-----------------|-----------------|-----------------------|-------------------------------------------|
|                          |                             | Levene's Test for Equality of Variances |      | t-test for Equality of Means |        |                 |                 |                       |                                           |
|                          |                             | F                                       | Sig. | t                            | df     | Sig. (2-tailed) | Mean Difference | Std. Error Difference | 95% Confidence Interval of the Difference |
| HDL_Dyslip               | Equal variances assumed     | 2.542                                   | .122 | -2.158                       | 28     | .040            | -6.66667        | 3.08925               | -12.99472 - .33862                        |
|                          | Equal variances not assumed |                                         |      | -2.158                       | 21.849 | .042            | -6.66667        | 3.08925               | -13.07595 - .25738                        |

## Figures 1-3 Overweight

### Hypothesis Test Summary

|   | Null Hypothesis                                                          | Test                                    | Sig. | Decision                    |
|---|--------------------------------------------------------------------------|-----------------------------------------|------|-----------------------------|
| 1 | The distribution of Dif_TC is the same across categories of Overweight.  | Independent-Samples Kruskal-Wallis Test | .000 | Reject the null hypothesis. |
| 2 | The distribution of Dif_TG is the same across categories of Overweight.  | Independent-Samples Kruskal-Wallis Test | .002 | Reject the null hypothesis. |
| 3 | The distribution of Dif_LDL is the same across categories of Overweight. | Independent-Samples Kruskal-Wallis Test | .000 | Reject the null hypothesis. |
| 4 | The distribution of Dif_HDL is the same across categories of Overweight. | Independent-Samples Kruskal-Wallis Test | .016 | Reject the null hypothesis. |
| 5 | The distribution of Dif_BMI is the same across categories of Overweight. | Independent-Samples Kruskal-Wallis Test | .133 | Retain the null hypothesis. |

Asymptotic significances are displayed. The significance level is .05.

## Obese

**Hypothesis Test Summary**

|   | Null Hypothesis                                                       | Test                                    | Sig. | Decision                    |
|---|-----------------------------------------------------------------------|-----------------------------------------|------|-----------------------------|
| 1 | The distribution of Dif_TC is the same across categories of Obesity.  | Independent-Samples Kruskal-Wallis Test | .000 | Reject the null hypothesis. |
| 2 | The distribution of Dif_TG is the same across categories of Obesity.  | Independent-Samples Kruskal-Wallis Test | .328 | Retain the null hypothesis. |
| 3 | The distribution of Dif_LDL is the same across categories of Obesity. | Independent-Samples Kruskal-Wallis Test | .000 | Reject the null hypothesis. |
| 4 | The distribution of Dif_HDL is the same across categories of Obesity. | Independent-Samples Kruskal-Wallis Test | .236 | Retain the null hypothesis. |
| 5 | The distribution of Dif_BMI is the same across categories of Obesity. | Independent-Samples Kruskal-Wallis Test | .000 | Reject the null hypothesis. |

Asymptotic significances are displayed. The significance level is .05.

## Dyslipidemic

**Hypothesis Test Summary**

|   | Null Hypothesis                                                                  | Test                                    | Sig. | Decision                    |
|---|----------------------------------------------------------------------------------|-----------------------------------------|------|-----------------------------|
| 1 | The distribution of Dif_CT_Dyslip is the same across categories of Group_TOTAL.  | Independent-Samples Kruskal-Wallis Test | .000 | Reject the null hypothesis. |
| 1 | The distribution of Dif_TG_Dyslip is the same across categories of Group_TOTAL.  | Independent-Samples Kruskal-Wallis Test | .003 | Reject the null hypothesis. |
| 1 | The distribution of Dif_LDL_Dyslip is the same across categories of Group_TOTAL. | Independent-Samples Kruskal-Wallis Test | .000 | Reject the null hypothesis. |
| 1 | The distribution of Dif_HDL_Dyslip is the same across categories of Group_TOTAL. | Independent-Samples Kruskal-Wallis Test | .037 | Reject the null hypothesis. |
| 1 | The distribution of Dif_BMI_Dyslip is the same across categories of Group_TOTAL. | Independent-Samples Kruskal-Wallis Test | .000 | Reject the null hypothesis. |

Asymptotic significances are displayed. The significance level is .05.



## TC. Overweight

Pairwise Comparisons of Overweight

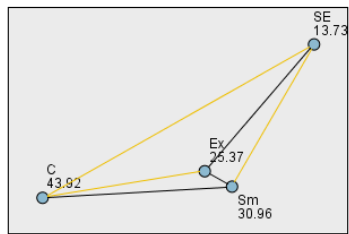

Each node shows the sample average rank of Overweight.

| Sample1-Sample2 | Test Statistic | Std. Error | Std. Test Statistic | Sig. | Adj.Sig. |
|-----------------|----------------|------------|---------------------|------|----------|
| SE-Ex           | -11.633        | 5.740      | -2.027              | .043 | .256     |
| SE-Sm           | -17.225        | 6.088      | -2.829              | .005 | .028     |
| SE-C            | -30.183        | 6.088      | -4.958              | .000 | .000     |
| Ex-Sm           | -5.592         | 6.088      | -.918               | .358 | 1.000    |
| Ex-C            | -18.550        | 6.088      | -3.047              | .002 | .014     |
| Sm-C            | -12.958        | 6.417      | -2.019              | .043 | .261     |

Each row tests the null hypothesis that the Sample 1 and Sample 2 distributions are the same. Asymptotic significances (2-sided tests) are displayed. The significance level is .05.

## TC. Obese

Pairwise Comparisons of Obesity

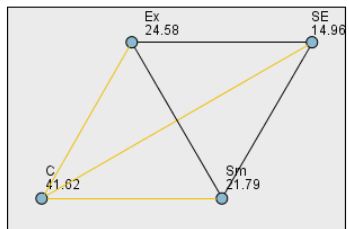

Each node shows the sample average rank of Obesity.

| Sample1-Sample2 | Test Statistic | Std. Error | Std. Test Statistic | Sig. | Adj.Sig. |
|-----------------|----------------|------------|---------------------|------|----------|
| SE-Sm           | -6.830         | 5.833      | -1.171              | .242 | 1.000    |
| SE-Ex           | -9.615         | 5.715      | -1.682              | .092 | .555     |
| SE-C            | -26.663        | 5.833      | -4.571              | .000 | .000     |
| Sm-Ex           | 2.785          | 5.833      | .478                | .633 | 1.000    |
| Sm-C            | -19.833        | 5.948      | -3.334              | .001 | .005     |
| Ex-C            | -17.048        | 5.833      | -2.923              | .003 | .021     |

Each row tests the null hypothesis that the Sample 1 and Sample 2 distributions are the same. Asymptotic significances (2-sided tests) are displayed. The significance level is .05.

## TC. Dyslipidemic

Pairwise Comparisons of Group\_TOTAL

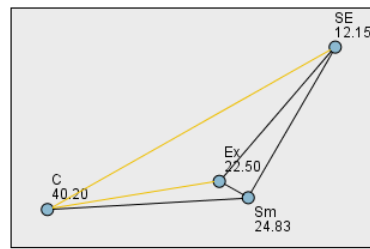

| Sample1.Sample2 | Test Statistic | Std. Error | Std. Test Statistic | Sig. | Adj.Sig. |
|-----------------|----------------|------------|---------------------|------|----------|
| SE-Ex           | -10.346        | 5.486      | -1.886              | .059 | .356     |
| SE-Sm           | -12.679        | 5.486      | -2.311              | .021 | .125     |
| SE-C            | -28.046        | 5.764      | -4.866              | .000 | .000     |
| Ex-Sm           | -2.333         | 5.594      | -.417               | .677 | 1.000    |
| Ex-C            | -17.700        | 5.867      | -3.017              | .003 | .015     |
| Sm-C            | -15.367        | 5.867      | -2.619              | .009 | .053     |

Each row tests the null hypothesis that the Sample 1 and Sample 2 distributions are the same. Asymptotic significances (2-sided tests) are displayed. The significance level is .05.

## TG. Overweight

Pairwise Comparisons of Overweight

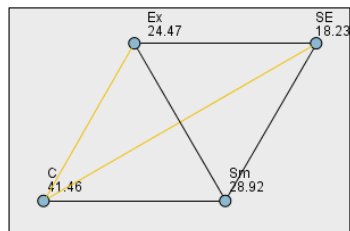

| Sample1.Sample2 | Test Statistic | Std. Error | Std. Test Statistic | Sig. | Adj.Sig. |
|-----------------|----------------|------------|---------------------|------|----------|
| SE-Ex           | -6.233         | 5.736      | -1.087              | .277 | 1.000    |
| SE-Sm           | -10.683        | 6.084      | -1.756              | .079 | .475     |
| SE-C            | -23.225        | 6.084      | -3.817              | .000 | .001     |
| Ex-Sm           | -4.450         | 6.084      | -.731               | .465 | 1.000    |
| Ex-C            | -16.992        | 6.084      | -2.793              | .005 | .031     |
| Sm-C            | -12.542        | 6.413      | -1.956              | .051 | .303     |

Each row tests the null hypothesis that the Sample 1 and Sample 2 distributions are the same. Asymptotic significances (2-sided tests) are displayed. The significance level is .05.

## TG. Obese

### ANOVA

Dif\_TG

|                | Sum of Squares | df | Mean Square | F    | Sig. |
|----------------|----------------|----|-------------|------|------|
| Between Groups | 1525.592       | 3  | 508.531     | .776 | .513 |
| Within Groups  | 30133.628      | 46 | 655.079     |      |      |
| Total          | 31659.220      | 49 |             |      |      |

### Multiple Comparisons

Dependent Variable: Dif\_TG

Tukey HSD

| (I) Obesity | (J) Obesity | Mean Difference (I-J) | Std. Error | Sig. | 95% Confidence Interval |             |
|-------------|-------------|-----------------------|------------|------|-------------------------|-------------|
|             |             |                       |            |      | Lower Bound             | Upper Bound |
| SE          | Ex          | 8.53846               | 10.03899   | .830 | -18.2204                | 35.2974     |
|             | Sm          | 14.44231              | 10.24600   | .500 | -12.8684                | 41.7530     |
|             | C           | 2.77564               | 10.24600   | .993 | -24.5350                | 30.0863     |
| Ex          | SE          | -8.53846              | 10.03899   | .830 | -35.2974                | 18.2204     |
|             | Sm          | 5.90385               | 10.24600   | .939 | -21.4068                | 33.2145     |
|             | C           | -5.76282              | 10.24600   | .943 | -33.0735                | 21.5479     |
| Sm          | SE          | -14.44231             | 10.24600   | .500 | -41.7530                | 12.8684     |
|             | Ex          | -5.90385              | 10.24600   | .939 | -33.2145                | 21.4068     |
|             | C           | -11.66667             | 10.44891   | .681 | -39.5182                | 16.1849     |
| C           | SE          | -2.77564              | 10.24600   | .993 | -30.0863                | 24.5350     |
|             | Ex          | 5.76282               | 10.24600   | .943 | -21.5479                | 33.0735     |
|             | Sm          | 11.66667              | 10.44891   | .681 | -16.1849                | 39.5182     |

## TG. Dyslipidemic

### Pairwise Comparisons of Group\_TOTAL

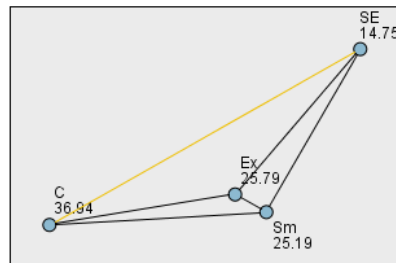

Each node shows the sample average rank of Group\_TOTAL.

| Sample1-Sample2 | Test Statistic | Std. Error | Std. Test Statistic | Sig. | Adj.Sig. |
|-----------------|----------------|------------|---------------------|------|----------|
| SE-Sm           | -10.442        | 5.388      | -1.938              | .053 | .316     |
| SE-Ex           | -11.042        | 5.503      | -2.006              | .045 | .269     |
| SE-C            | -22.194        | 5.977      | -3.713              | .000 | .001     |
| Sm-Ex           | .599           | 5.600      | .107                | .915 | 1.000    |
| Sm-C            | -11.752        | 6.066      | -1.937              | .053 | .316     |
| Ex-C            | -11.153        | 6.169      | -1.808              | .071 | .424     |

Each row tests the null hypothesis that the Sample 1 and Sample 2 distributions are the same. Asymptotic significances (2-sided tests) are displayed. The significance level is .05.

## LDL-C. Overweight

Pairwise Comparisons of Overweight

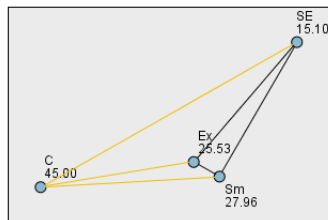

Each node shows the sample average rank of Overweight.

| Sample1-Sample2 | Test Statistic | Std. Error | Std. Test Statistic | Sig. | Adj.Sig. |
|-----------------|----------------|------------|---------------------|------|----------|
| SE-Ex           | -10.433        | 5.743      | -1.817              | .069 | .416     |
| SE-Sm           | -12.858        | 6.092      | -2.111              | .035 | .209     |
| SE-C            | -29.900        | 6.092      | -4.908              | .000 | .000     |
| Ex-Sm           | -2.425         | 6.092      | -.398               | .691 | 1.000    |
| Ex-C            | -19.467        | 6.092      | -3.196              | .001 | .008     |
| Sm-C            | -17.042        | 6.421      | -2.654              | .008 | .048     |

Each row tests the null hypothesis that the Sample 1 and Sample 2 distributions are the same. Asymptotic significances (2-sided tests) are displayed. The significance level is .05.

## LDL-C. Obese

Pairwise Comparisons of Obesity

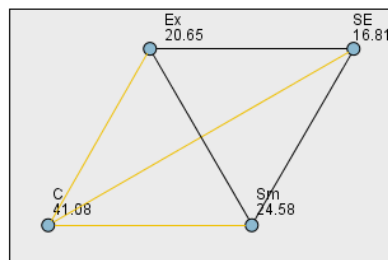

Each node shows the sample average rank of Obesity.

| Sample1-Sample2 | Test Statistic | Std. Error | Std. Test Statistic | Sig. | Adj.Sig. |
|-----------------|----------------|------------|---------------------|------|----------|
| SE-Ex           | -3.846         | 5.718      | -.673               | .501 | 1.000    |
| SE-Sm           | -7.776         | 5.835      | -1.332              | .183 | 1.000    |
| SE-C            | -24.276        | 5.835      | -4.160              | .000 | .000     |
| Ex-Sm           | -3.929         | 5.835      | -.673               | .501 | 1.000    |
| Ex-C            | -20.429        | 5.835      | -3.501              | .000 | .003     |
| Sm-C            | -16.500        | 5.951      | -2.773              | .006 | .033     |

Each row tests the null hypothesis that the Sample 1 and Sample 2 distributions are the same. Asymptotic significances (2-sided tests) are displayed. The significance level is .05.

## LDL-C. Dyslipidemic

Pairwise Comparisons of Group\_TOTAL

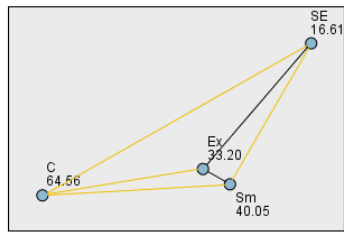

| Sample1-Sample2 | Test Statistic | Std. Error | Std. Test Statistic | Sig. | Adj.Sig. |
|-----------------|----------------|------------|---------------------|------|----------|
| SE-Ex           | -16.589        | 7.174      | -2.312              | .021 | .125     |
| SE-Sm           | -23.439        | 7.174      | -3.267              | .001 | .007     |
| SE-C            | -47.944        | 7.361      | -6.514              | .000 | .000     |
| Ex-Sm           | -6.850         | 6.983      | -.981               | .327 | 1.000    |
| Ex-C            | -31.356        | 7.174      | -4.370              | .000 | .000     |
| Sm-C            | -24.506        | 7.174      | -3.416              | .001 | .004     |

Each row tests the null hypothesis that the Sample 1 and Sample 2 distributions are the same. Asymptotic significances (2-sided tests) are displayed. The significance level is .05.

## HDL-C. Overweight

Pairwise Comparisons of Overweight

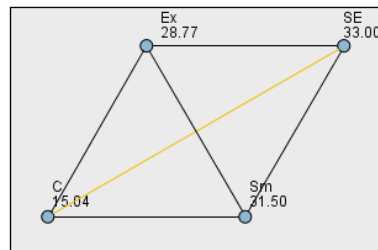

| Sample1-Sample2 | Test Statistic | Std. Error | Std. Test Statistic | Sig. | Adj.Sig. |
|-----------------|----------------|------------|---------------------|------|----------|
| C-Ex            | 13.725         | 6.066      | 2.262               | .024 | .142     |
| C-Sm            | 16.458         | 6.395      | 2.574               | .010 | .060     |
| C-SE            | 17.958         | 6.066      | 2.960               | .003 | .018     |
| Ex-Sm           | -2.733         | 6.066      | -.451               | .652 | 1.000    |
| Ex-SE           | 4.233          | 5.720      | .740                | .459 | 1.000    |
| Sm-SE           | 1.500          | 6.066      | .247                | .805 | 1.000    |

Each row tests the null hypothesis that the Sample 1 and Sample 2 distributions are the same. Asymptotic significances (2-sided tests) are displayed. The significance level is .05.

## HDL-C. Obese

### ANOVA

Dif\_HDL

|                | Sum of Squares | df | Mean Square | F     | Sig. |
|----------------|----------------|----|-------------|-------|------|
| Between Groups | 575.143        | 3  | 191.714     | 1.346 | .271 |
| Within Groups  | 6552.077       | 46 | 142.436     |       |      |
| Total          | 7127.220       | 49 |             |       |      |

### Multiple Comparisons

Dependent Variable: Dif\_HDL

Tukey HSD

| (I) Obesity | (J) Obesity | Mean Difference (I-J) | Std. Error | Sig.  | 95% Confidence Interval |             |
|-------------|-------------|-----------------------|------------|-------|-------------------------|-------------|
|             |             |                       |            |       | Lower Bound             | Upper Bound |
| SE          | Ex          | -2.38462              | 4.68116    | .956  | -14.8622                | 10.0930     |
|             | Sm          | 5.11538               | 4.77769    | .709  | -7.6195                 | 17.8503     |
|             | C           | 5.61538               | 4.77769    | .645  | -7.1195                 | 18.3503     |
| Ex          | SE          | 2.38462               | 4.68116    | .956  | -10.0930                | 14.8622     |
|             | Sm          | 7.50000               | 4.77769    | .406  | -5.2349                 | 20.2349     |
|             | C           | 8.00000               | 4.77769    | .349  | -4.7349                 | 20.7349     |
| Sm          | SE          | -5.11538              | 4.77769    | .709  | -17.8503                | 7.6195      |
|             | Ex          | -7.50000              | 4.77769    | .406  | -20.2349                | 5.2349      |
|             | C           | .50000                | 4.87231    | 1.000 | -12.4871                | 13.4871     |
| C           | SE          | -5.61538              | 4.77769    | .645  | -18.3503                | 7.1195      |
|             | Ex          | -8.00000              | 4.77769    | .349  | -20.7349                | 4.7349      |
|             | Sm          | -.50000               | 4.87231    | 1.000 | -13.4871                | 12.4871     |

## HDL-C. Dyslipidemic

### Pairwise Comparisons of Group\_TOTAL

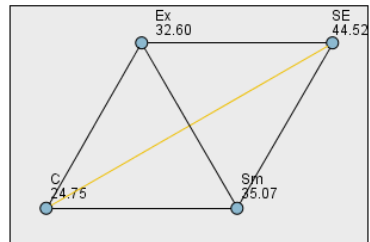

Each node shows the sample average rank of Group\_TOTAL.

| Sample1-Sample2 | Test Statistic | Std. Error | Std. Test Statistic | Sig. | Adj.Sig. |
|-----------------|----------------|------------|---------------------|------|----------|
| C-Ex            | 7.850          | 6.972      | 1.126               | .260 | 1.000    |
| C-Sm            | 10.317         | 7.436      | 1.387               | .165 | .992     |
| C-SE            | 19.775         | 6.972      | 2.836               | .005 | .027     |
| Ex-Sm           | -2.467         | 6.834      | -.361               | .718 | 1.000    |
| Ex-SE           | 11.925         | 6.327      | 1.885               | .059 | .357     |
| Sm-SE           | 9.458          | 6.834      | 1.384               | .166 | .998     |

Each row tests the null hypothesis that the Sample 1 and Sample 2 distributions are the same. Asymptotic significances (2-sided tests) are displayed. The significance level is .05.

BMI. Overweight

ANOVA

Dif\_BMI

|                | Sum of Squares | df | Mean Square | F     | Sig. |
|----------------|----------------|----|-------------|-------|------|
| Between Groups | 1.918          | 3  | .639        | 2.706 | .055 |
| Within Groups  | 11.812         | 50 | .236        |       |      |
| Total          | 13.730         | 53 |             |       |      |

Multiple Comparisons

Dependent Variable: Dif\_BMI  
Tukey HSD

| (I) Overweight | (J) Overweight | Mean Difference (I-J) | Std. Error | Sig. | 95% Confidence Interval |             |
|----------------|----------------|-----------------------|------------|------|-------------------------|-------------|
|                |                |                       |            |      | Lower Bound             | Upper Bound |
| C              | SE             | -.47674 <sup>*</sup>  | .17748     | .047 | -.9484                  | -.0051      |
|                | Ex             | -.18188               | .18825     | .769 | -.6822                  | .3184       |
|                | Sm             | -.36340               | .18825     | .229 | -.8637                  | .1369       |
| SE             | C              | .47674 <sup>*</sup>   | .17748     | .047 | .0051                   | .9484       |
|                | Ex             | .29486                | .18825     | .407 | -.2054                  | .7951       |
|                | Sm             | .11333                | .18825     | .931 | -.3869                  | .6136       |
| Ex             | C              | .18188                | .18825     | .769 | -.3184                  | .6822       |
|                | SE             | -.29486               | .18825     | .407 | -.7951                  | .2054       |
|                | Sm             | -.18153               | .19843     | .797 | -.7089                  | .3458       |
| Sm             | C              | .36340                | .18825     | .229 | -.1369                  | .8637       |
|                | SE             | -.11333               | .18825     | .931 | -.6136                  | .3869       |
|                | Ex             | .18153                | .19843     | .797 | -.3458                  | .7089       |

\*. The mean difference is significant at the 0.05 level.

BMI. Obese

Pairwise Comparisons of Obesity

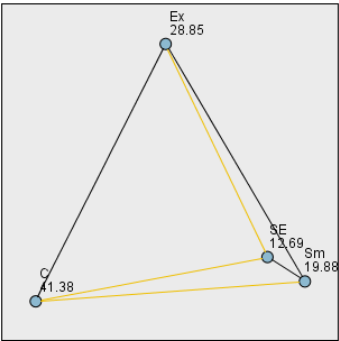

Each node shows the sample average rank of Obesity.

| Sample1-Sample2 | Test Statistic | Std. Error | Std. Test Statistic | Sig. | Adj.Sig. |
|-----------------|----------------|------------|---------------------|------|----------|
| SE-Sm           | -7.183         | 5.823      | -1.233              | .217 | 1.000    |
| SE-Ex           | -16.154        | 5.706      | -2.831              | .005 | .028     |
| SE-C            | -28.683        | 5.823      | -4.926              | .000 | .000     |
| Sm-Ex           | 8.971          | 5.823      | 1.541               | .123 | .741     |
| Sm-C            | -21.500        | 5.939      | -3.620              | .000 | .002     |
| Ex-C            | -12.529        | 5.823      | -2.152              | .031 | .189     |

Each row tests the null hypothesis that the Sample 1 and Sample 2 distributions are the same. Asymptotic significances (2-sided tests) are displayed. The significance level is .05.

## BMI. Dyslipidemic

Pairwise Comparisons of Group\_TOTAL

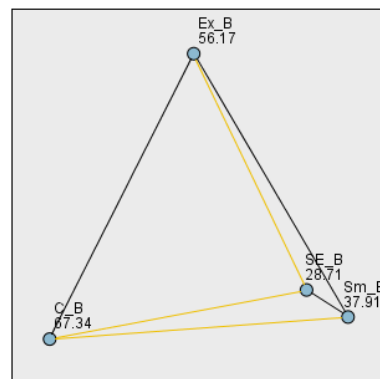

Each node shows the sample average rank of Group\_TOTAL.

| Sample1-Sample2 | Test Statistic | Std. Error | Std. Test Statistic | Sig. | Adj.Sig. |
|-----------------|----------------|------------|---------------------|------|----------|
| SE_B-Sm_B       | -9.201         | 8.035      | -1.145              | .252 | 1.000    |
| SE_B-Ex_B       | -27.465        | 7.706      | -3.564              | .000 | .002     |
| SE_B-C_B        | -38.633        | 8.035      | -4.808              | .000 | .000     |
| Sm_B-Ex_B       | 18.264         | 7.886      | 2.316               | .021 | .123     |
| Sm_B-C_B        | -29.432        | 8.208      | -3.586              | .000 | .002     |
| Ex_B-C_B        | -11.168        | 7.886      | -1.416              | .157 | .940     |

Each row tests the null hypothesis that the Sample 1 and Sample 2 distributions are the same. Asymptotic significances (2-sided tests) are displayed. The significance level is .05.

**Table 1. Statistical analysis of baseline characteristics of subjects at the starting point of day 0 and after the wash-out period (day 56)**

| Group Statistics  |    |          |                |                 |
|-------------------|----|----------|----------------|-----------------|
| Session           | N  | Mean     | Std. Deviation | Std. Error Mean |
| BMI First session | 52 | 30.2994  | 4.04770        | .56131          |
| Third session     | 52 | 30.1011  | 4.03404        | .55942          |
| TC First session  | 51 | 196.0196 | 34.65054       | 4.85205         |
| Third session     | 51 | 196.4118 | 36.66179       | 5.13368         |
| TG First session  | 51 | 141.4118 | 43.08697       | 6.03338         |
| Third session     | 51 | 145.4118 | 37.55166       | 5.25828         |
| LDL First session | 51 | 135.5725 | 33.78241       | 4.73048         |
| Third session     | 51 | 132.8784 | 35.65912       | 4.99328         |
| HDL First session | 51 | 33.6275  | 10.00592       | 1.40111         |
| Third session     | 51 | 34.2353  | 8.95229        | 1.25357         |



**Independent Samples Test**

|     |                             | Levene's Test for Equality of Variances |      | t-test for Equality of Means |         |                 |                 |                       |                                           |          |
|-----|-----------------------------|-----------------------------------------|------|------------------------------|---------|-----------------|-----------------|-----------------------|-------------------------------------------|----------|
|     |                             | F                                       | Sig. | t                            | df      | Sig. (2-tailed) | Mean Difference | Std. Error Difference | 95% Confidence Interval of the Difference |          |
|     |                             |                                         |      |                              |         |                 |                 |                       | Lower                                     | Upper    |
| BMI | Equal variances assumed     | .000                                    | .990 | .250                         | 102     | .803            | .19830          | .79248                | -1.37358                                  | 1.77018  |
|     | Equal variances not assumed |                                         |      | .250                         | 101.999 | .803            | .19830          | .79248                | -1.37358                                  | 1.77018  |
| TC  | Equal variances assumed     | .613                                    | .435 | -.056                        | 100     | .956            | -.39216         | 7.06378               | -14.40650                                 | 13.62218 |
|     | Equal variances not assumed |                                         |      | -.056                        | 99.683  | .956            | -.39216         | 7.06378               | -14.40704                                 | 13.62273 |
| TG  | Equal variances assumed     | .736                                    | .393 | -.500                        | 100     | .618            | -4.00000        | 8.00320               | -19.87813                                 | 11.87813 |
|     | Equal variances not assumed |                                         |      | -.500                        | 98.167  | .618            | -4.00000        | 8.00320               | -19.88176                                 | 11.88176 |
| LDL | Equal variances assumed     | .593                                    | .443 | .392                         | 100     | .696            | 2.69412         | 6.87825               | -10.95213                                 | 16.34036 |
|     | Equal variances not assumed |                                         |      | .392                         | 99.709  | .696            | 2.69412         | 6.87825               | -10.95262                                 | 16.34085 |
| HDL | Equal variances assumed     | .402                                    | .527 | -.323                        | 100     | .747            | -.60784         | 1.88004               | -4.33779                                  | 3.12210  |
|     | Equal variances not assumed |                                         |      | -.323                        | 98.787  | .747            | -.60784         | 1.88004               | -4.33835                                  | 3.12266  |
